# Supplementary material
Source: PubMed Central journal article supplement (PMC6916528)
Supplement: Supp_Table1.pdf [file Supp_Table1.pdf]

## Supplementary Data

SUPPLEMENTARY TABLE S1. COMPARISON OF TOPIC DISCUSSION ACROSS ONCOLOGY  
AND PALLIATIVE CARE VISITS (ONLINE ONLY)

|                                                                              | <i>Early, integrated palliative care<br/>intervention visits, N=68</i> |                                       |
|------------------------------------------------------------------------------|------------------------------------------------------------------------|---------------------------------------|
|                                                                              | <i>Oncologists</i>                                                     | <i>Palliative care<br/>clinicians</i> |
| <b>SYMPTOM MANAGEMENT</b>                                                    | <b>34</b>                                                              | <b>34</b>                             |
| Assessing symptoms                                                           | 34                                                                     | 34                                    |
| Appetite                                                                     | 21                                                                     | 24                                    |
| Bleeding                                                                     | 14                                                                     | 2                                     |
| Cachexia/weight loss                                                         | 6                                                                      | 13                                    |
| Dyspnea/cough                                                                | 28                                                                     | 26                                    |
| Edema                                                                        | 0                                                                      | 4                                     |
| Emotional and mood symptoms                                                  | 5                                                                      | 14                                    |
| Fatigue                                                                      | 18                                                                     | 20                                    |
| General symptoms                                                             | 13                                                                     | 11                                    |
| Gastrointestinal/genitourinary                                               | 18                                                                     | 25                                    |
| Nausea/vomiting                                                              | 11                                                                     | 14                                    |
| Neurological symptoms                                                        | 10                                                                     | 7                                     |
| Other symptoms                                                               | 25                                                                     | 20                                    |
| Pain                                                                         | 18                                                                     | 26                                    |
| Sexuality/intimacy                                                           | 0                                                                      | 0                                     |
| Skin issues                                                                  | 15                                                                     | 4                                     |
| Sleep                                                                        | 12                                                                     | 22                                    |
| Treating symptoms                                                            | 32                                                                     | 33                                    |
| Appetite                                                                     | 2                                                                      | 10                                    |
| Bleeding                                                                     | 1                                                                      | 0                                     |
| Cachexia/weight loss                                                         | 0                                                                      | 2                                     |
| Dyspnea/cough                                                                | 11                                                                     | 10                                    |
| Edema                                                                        | 3                                                                      | 6                                     |
| Emotional and mood symptoms                                                  | 3                                                                      | 10                                    |
| Fatigue                                                                      | 8                                                                      | 16                                    |
| General symptoms                                                             | 0                                                                      | 1                                     |
| Gastrointestinal/genitourinary                                               | 11                                                                     | 22                                    |
| Nausea/vomiting                                                              | 10                                                                     | 6                                     |
| Neurological symptoms                                                        | 2                                                                      | 2                                     |
| Other symptoms                                                               | 13                                                                     | 5                                     |
| Pain                                                                         | 18                                                                     | 22                                    |
| Sexuality/intimacy                                                           | 0                                                                      | 0                                     |
| Skin issues                                                                  | 3                                                                      | 1                                     |
| Sleep                                                                        | 2                                                                      | 12                                    |
| Coordinating symptom management                                              | 7                                                                      | 6                                     |
| Discussing and providing referral for symptom management                     | 0                                                                      | 0                                     |
| Encourage disclosure of symptoms now and in the future                       | 11                                                                     | 14                                    |
| Evaluating symptom management                                                | 25                                                                     | 29                                    |
| Ask if symptom management strategies are effective                           | 17                                                                     | 28                                    |
| Discuss future evaluation of new symptom management strategies               | 11                                                                     | 10                                    |
| Encourage and or empower patient and caregiver to self-manage their symptoms | 5                                                                      | 12                                    |
| Make changes to previous symptom management strategies                       | 14                                                                     | 17                                    |
| Medication check                                                             | 16                                                                     | 22                                    |
| Preparing for anticipated symptoms                                           | 13                                                                     | 11                                    |
| <b>MEDICAL UNDERSTANDING</b>                                                 | <b>34</b>                                                              | <b>33</b>                             |
| Discuss cancer response to treatment                                         | 30                                                                     | 30                                    |
| Inform patient of new medical information                                    | 22                                                                     | 5                                     |
| Review patient progress on current or past treatments                        | 26                                                                     | 29                                    |
| Discuss illness prognosis                                                    | 5                                                                      | 18                                    |
| Assess and discuss patient and caregiver understanding of patient prognosis  | 3                                                                      | 15                                    |

*(continued)*

SUPPLEMENTARY TABLE S1. (CONTINUED)

|                                                                                   | <i>Early, integrated palliative care intervention visits, N=68</i> |                                   |
|-----------------------------------------------------------------------------------|--------------------------------------------------------------------|-----------------------------------|
|                                                                                   | <i>Oncologists</i>                                                 | <i>Palliative care clinicians</i> |
| Discuss what impacts prognosis (treatment, care, etc.)                            | 4                                                                  | 4                                 |
| Inform patient and caregiver of prognosis                                         | 1                                                                  | 2                                 |
| Request patient and caregiver preference for discussing prognosis                 | 0                                                                  | 4                                 |
| <b>Understanding and expectations of illness process</b>                          | <b>17</b>                                                          | <b>17</b>                         |
| Assess patient and caregiver understanding and expectations of illness process    | 1                                                                  | 4                                 |
| Inform patient and caregiver of illness process                                   | 16                                                                 | 14                                |
| <b>Understanding and expectations of treatment process</b>                        | <b>31</b>                                                          | <b>27</b>                         |
| Assess patient and caregiver understanding and expectations of treatment process  | 4                                                                  | 20                                |
| Inform patient and caregiver of treatment process                                 | 31                                                                 | 24                                |
| <b>TREATMENT DECISION MAKING</b>                                                  | <b>34</b>                                                          | <b>34</b>                         |
| Discuss how patient experiencing treatment and (or) disease experience (general)  | 26                                                                 | 23                                |
| Discuss treatment options and considerations                                      | 34                                                                 | 27                                |
| Address concerns regarding treatment or disease (any questions)                   | 34                                                                 | 22                                |
| Discuss clinical trials                                                           | 19                                                                 | 10                                |
| Discuss second opinions                                                           | 3                                                                  | 1                                 |
| Discuss treatment discontinuation                                                 | 3                                                                  | 5                                 |
| Discuss treatment efficacy                                                        | 15                                                                 | 3                                 |
| Help evaluate benefits, risks, burdens, and side effects                          | 15                                                                 | 14                                |
| Treatment related to patient attitudes, values, and life goal alignment           | 2                                                                  | 17                                |
| Treatment related to patient quality of life                                      | 22                                                                 | 16                                |
| Negotiate treatment decisions between patients and caregivers                     | 18                                                                 | 11                                |
| Inquire and affirm patient preferences for decision making                        | 4                                                                  | 13                                |
| Decision-making style                                                             | 1                                                                  | 4                                 |
| Patient attitudes, values, and treatment-life goal alignment                      | 3                                                                  | 11                                |
| Patient quality of life                                                           | 1                                                                  | 4                                 |
| Provide recommendations and suggestions regarding treatment or care               | 17                                                                 | 8                                 |
| Request feedback from patient and caregiver regarding recommendation              | 2                                                                  | 3                                 |
| Support patient decisions                                                         | 1                                                                  | 9                                 |
| Emphasize patient autonomy                                                        | 1                                                                  | 6                                 |
| Give patient and caregiver permission to change mind                              | 1                                                                  | 1                                 |
| Involve caregiver to degree patient wants                                         | 0                                                                  | 7                                 |
| Support patient and caregiver decision to start or stop treatment                 | 1                                                                  | 2                                 |
| Support patient and caregiver decision to stop or refuse treatment                | 1                                                                  | 0                                 |
| <b>Emphasizing and reinforcing their partnership with patients and caregivers</b> | <b>30</b>                                                          | <b>34</b>                         |
| Trust-building with patient and caregiver                                         | 21                                                                 | 28                                |
| Encourage patient disclosure of symptoms, side effects, and any concerns          | 21                                                                 | 26                                |
| Establish patient (dis)comfort with discussing issues                             | 0                                                                  | 1                                 |
| Reassure patient that discussions (end-of-life, etc.) will be raised as needed    | 0                                                                  | 2                                 |
| Reinforce partnership between patient, caregivers, and health care team           | 5                                                                  | 21                                |
| <b>Understanding of patient experience</b>                                        | <b>27</b>                                                          | <b>34</b>                         |
| Clarify patient experience                                                        | 18                                                                 | 17                                |
| Discuss and validate patient wishes, values, concerns, and emotions               | 14                                                                 | 34                                |
| Discuss lifestyle changes related to illness                                      | 12                                                                 | 21                                |
| Discuss patient outside context of illness                                        | 18                                                                 | 30                                |
| <b>COPING WITH ILLNESS</b>                                                        | <b>4</b>                                                           | <b>27</b>                         |
| Ask about past coping methods (positive and negative)                             | 1                                                                  | 7                                 |
| Discuss and advocate for different coping methods                                 | 4                                                                  | 26                                |
| Accepting living with illness                                                     | 1                                                                  | 11                                |
| Acknowledging limitations due to disease                                          | 0                                                                  | 1                                 |
| Defining what is in their control                                                 | 0                                                                  | 10                                |
| Maintaining hope                                                                  | 0                                                                  | 6                                 |
| <b>Behavioral approaches</b>                                                      | <b>1</b>                                                           | <b>13</b>                         |
| Activity pacing                                                                   | 0                                                                  | 5                                 |
| Breathing                                                                         | 0                                                                  | 0                                 |
| Exercise                                                                          | 0                                                                  | 0                                 |
| Help and encourage patient to maintain normal life outside of illness             | 0                                                                  | 6                                 |
| Meditation                                                                        | 0                                                                  | 1                                 |
| Relaxation techniques                                                             | 1                                                                  | 5                                 |

(continued)

SUPPLEMENTARY TABLE S1. (CONTINUED)

|                                                                                 | <i>Early, integrated palliative care intervention visits, N=68</i> |                                   |
|---------------------------------------------------------------------------------|--------------------------------------------------------------------|-----------------------------------|
|                                                                                 | <i>Oncologists</i>                                                 | <i>Palliative care clinicians</i> |
| Sleep hygiene                                                                   | 0                                                                  | 3                                 |
| Cognitive approaches                                                            | 0                                                                  | 3                                 |
| Brainstorm positive experiences                                                 | 0                                                                  | 0                                 |
| Distraction                                                                     | 0                                                                  | 2                                 |
| Problem solving                                                                 | 0                                                                  | 1                                 |
| Life review                                                                     | 0                                                                  | 0                                 |
| Consider patients legacy                                                        | 0                                                                  | 0                                 |
| Discuss how patient wants to spend remaining time                               | 0                                                                  | 0                                 |
| Reflect on patients' life experiences                                           | 0                                                                  | 1                                 |
| Social support                                                                  | 1                                                                  | 14                                |
| Emotional                                                                       | 0                                                                  | 11                                |
| Finding and using social support                                                | 0                                                                  | 6                                 |
| Informational                                                                   | 0                                                                  | 1                                 |
| Instrumental                                                                    | 0                                                                  | 8                                 |
| Spiritual                                                                       | 2                                                                  | 7                                 |
| Discuss personal religious beliefs and or practices                             | 2                                                                  | 4                                 |
| Discuss religious affiliation                                                   | 0                                                                  | 1                                 |
| Discuss spiritual traditions                                                    | 0                                                                  | 2                                 |
| Involve chaplain                                                                | 0                                                                  | 1                                 |
| Help patient reflect on difficulties of illness                                 | 0                                                                  | 7                                 |
| Help patient review how his or her life has changed                             | 0                                                                  | 1                                 |
| Strengthen patient's belief in his or her coping ability                        | 0                                                                  | 2                                 |
| <b>SUPPORTING CAREGIVERS AND LOVED ONES</b>                                     | <b>16</b>                                                          | <b>30</b>                         |
| Supporting caregivers (caregiver present during encounter)                      | 13                                                                 | 28                                |
| Discuss effect of illness on caregiver                                          | 1                                                                  | 7                                 |
| Assess caregiver's need for assistance in caregiving                            | 0                                                                  | 2                                 |
| Discuss challenges of caregiving                                                | 1                                                                  | 6                                 |
| Discuss relationship between patient and caregiver                              | 8                                                                  | 25                                |
| Discuss changes in relationship                                                 | 3                                                                  | 12                                |
| Elicit how patient and caregiver have related to each in the past               | 0                                                                  | 8                                 |
| Help caregiver deal with patient's illness                                      | 1                                                                  | 9                                 |
| Assess and support caregiver desire for hope                                    | 0                                                                  | 6                                 |
| Assist caregiver engage in self-care                                            | 1                                                                  | 2                                 |
| Discuss coping strategies for caregiver                                         | 0                                                                  | 1                                 |
| Emphasize need for caregiver to have social support                             | 0                                                                  | 3                                 |
| Teach caregiver skills to help patient cope                                     | 0                                                                  | 3                                 |
| Understanding caregiver experience                                              | 5                                                                  | 16                                |
| Clarify caregiver experience                                                    | 5                                                                  | 15                                |
| Discuss and validate caregiver values, concerns, and experience                 | 4                                                                  | 13                                |
| Discuss caregiver outside context of illness                                    | 1                                                                  | 2                                 |
| Supporting loved ones (family, friends, and others <i>not</i> present at visit) | 3                                                                  | 8                                 |
| Discuss effect of illness on loved one                                          | 1                                                                  | 5                                 |
| Assess loved one's need for assistance in coping                                | 1                                                                  | 0                                 |
| Discuss loved one's challenges with coping                                      | 0                                                                  | 2                                 |
| Discuss relationship between patient and loved one                              | 2                                                                  | 6                                 |
| Discuss changes in relationship                                                 | 0                                                                  | 0                                 |
| Elicit how patient and loved one have related to each in the past               | 0                                                                  | 1                                 |
| <b>ADVANCE CARE PLANNING</b>                                                    | <b>9</b>                                                           | <b>14</b>                         |
| Coordinating advance care planning with caregivers                              | 1                                                                  | 5                                 |
| Discussing advance care options                                                 | 9                                                                  | 15                                |
| Code status                                                                     | 3                                                                  | 11                                |
| Comfort care                                                                    | 2                                                                  | 1                                 |
| Funeral planning                                                                | 1                                                                  | 3                                 |
| Health care proxy                                                               | 1                                                                  | 10                                |
| Home care                                                                       | 2                                                                  | 3                                 |
| Hospice                                                                         | 8                                                                  | 9                                 |
| Location of death preferences                                                   | 0                                                                  | 2                                 |
| Will                                                                            | 0                                                                  | 4                                 |
| Referencing and discussing future conversations about advance care planning     | 1                                                                  | 6                                 |

Highlighted rows indicate a first-level (high-level, broad) coding. First-level codes are in all caps and highlighted in dark gray. Second-level codes are highlighted in medium gray. Third-level codes (if they do not have any subcodes) have no highlighting. If a third-level code has subcodes, the third-level code is highlighted in light gray.
